# Supplementary material for: Glutaminase-1 (GLS1) inhibition limits metastatic progression in osteosarcoma
Source: PubMed Central journal article supplement (PMC7057558; doi:10.1186/s40170-020-0209-8), 2020-03-05
Supplement: 40170_2020_209_MOESM1_ESM.pdf [file 40170_2020_209_MOESM1_ESM.pdf]

FIGURE S1

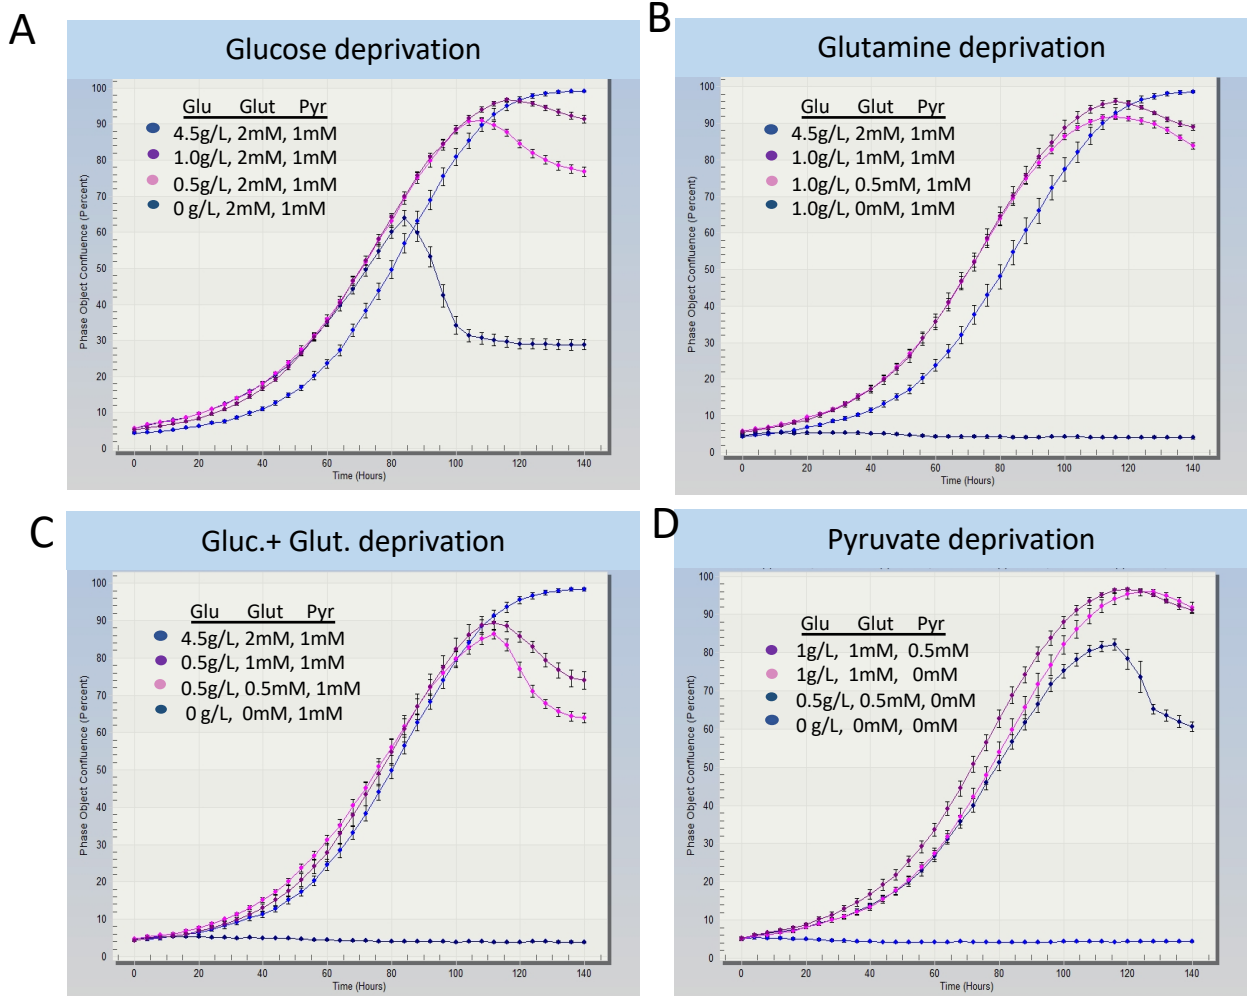

**Murine OS cells K7M2 are sensitive to glutamine depletion.** The proliferation responses of murine OS K7M2 cells to the deprivation of three carbon source nutrients: glucose (**A**), glutamine (**B**), both glucose and glutamine (**C**) or pyruvate (**D**) for 6 days.

FIGURE S2

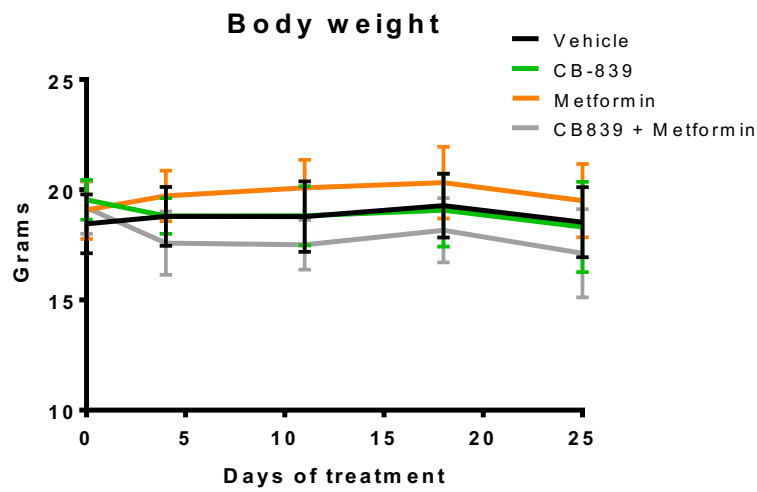

**Body weights of mice treated with CB-839, metformin and combination:** The measurements were taken once a week after tumor cells injection. No significant difference was found for mice body weigh through treatment period.

FIGURE S3

A

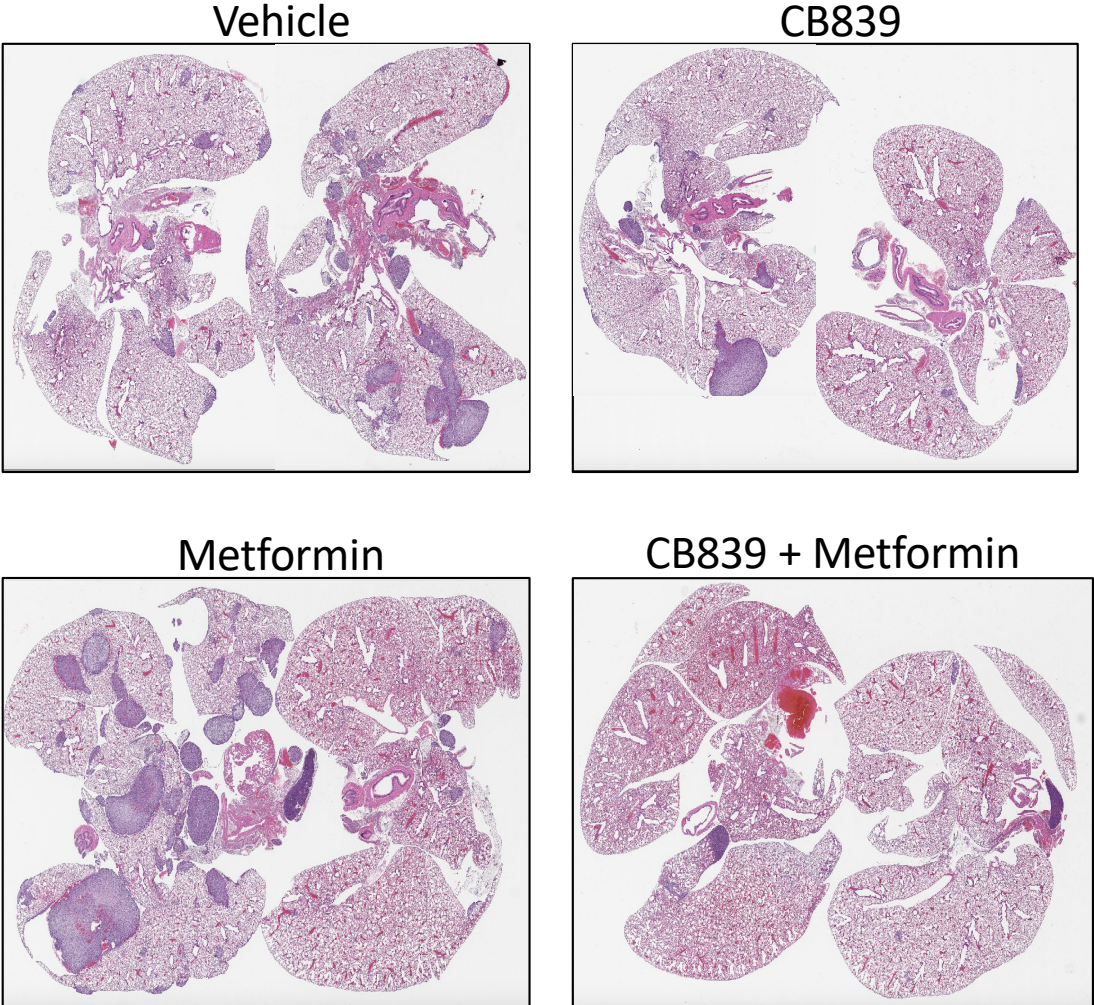

B

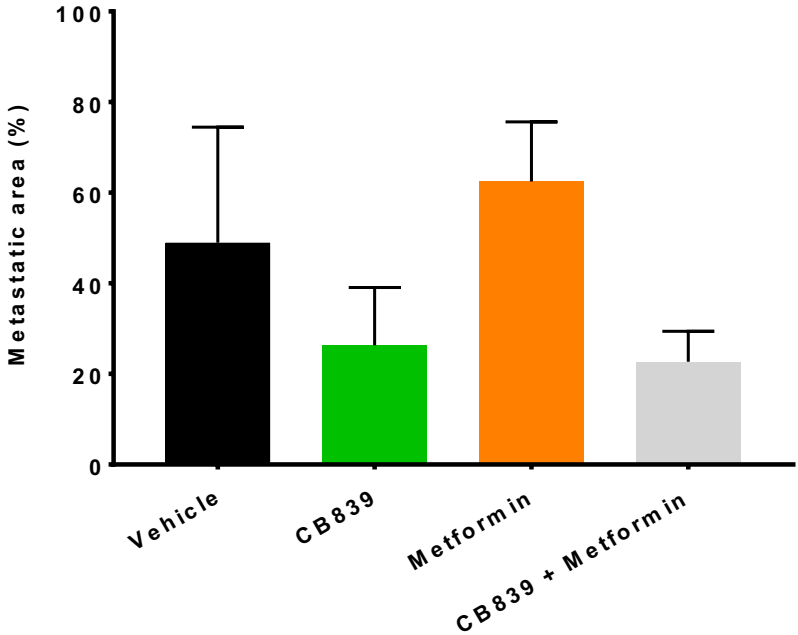

C

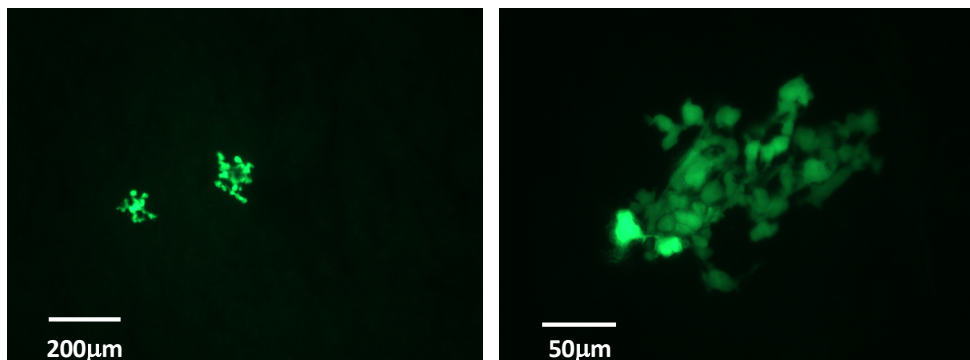

**A.** Representative H&E stained whole lung sections of the mice treated with CB-839, metformin and the combination.  
**B.** The experimental metastasis model of murine osteosarcoma K7M2 cells. Half million cells were intravenously injected into Balb/c mice. Mice received daily gavage of vehicle, CB-839 (200 mg/kg, twice a day), metformin (300 mg/kg, once a day) or combination of CB-839 and Metformin (n = 4). The treatments were started at day 2 for a total of 25 days. Data displayed as bar plots and SD representing the percentage of lung metastatic area over the whole lung section. **C.** Representative fluorescent images of the lung micro-metastases 9 days after the intravenous injection of OS MG63.3/GFP cells. Measurement as shown by the bars.

## FIGURE S4

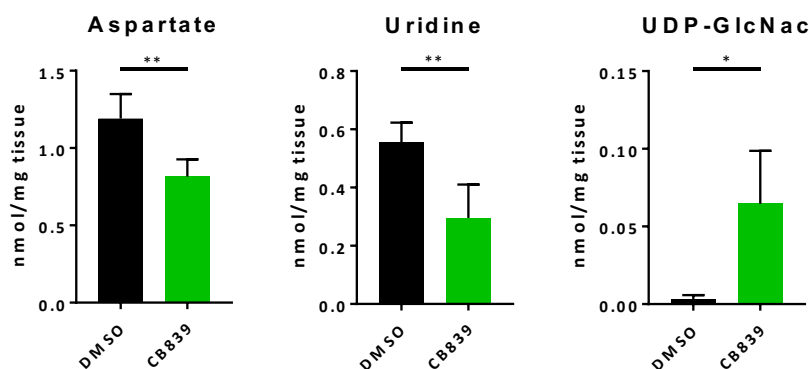

**Figure S4.** Metabolites found to be significantly dysregulated *via*  $^1\text{H}$  NMR upon CB-839 treatment alone: Aspartate, uridine and UDP-N-acetylglucosamine (GlcNac) concentrations as nmol/mg tissue. t-test followed by Welch correction, \*  $p < 0.05$ , \*\*  $p < 0.01$ , \*\*\*  $p < 0.001$ .

## FIGURE S5

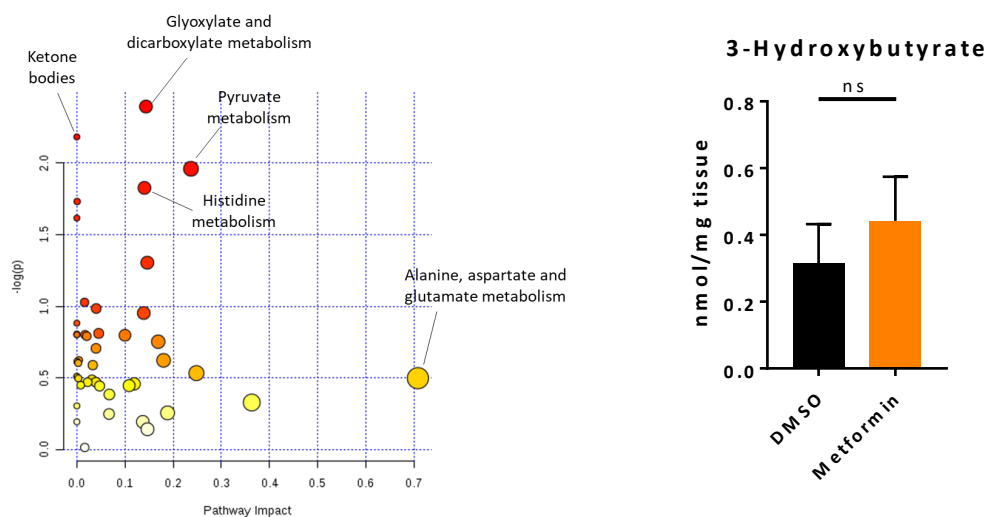

**Figure S5.** Pathways analysis and 3-HB levels from mice treated with metformin alone: A, Pathway analysis performed using the concentration of all the metabolites identified by  $^1\text{H}$  NMR. Only relevant pathways are labeled for clarity purposes. B, 3-Hydroxybutyrate concentration obtained by  $^1\text{H}$  NMR ( $p = 0.082$ , t-test followed by Welch correction).

## FIGURE S6

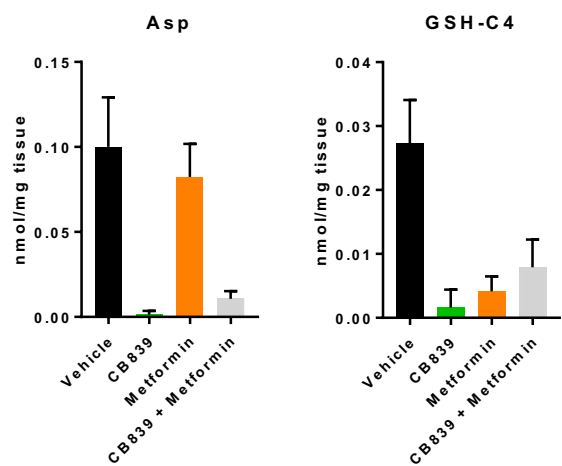

**Figure S6.**  $^{13}\text{C}$ -Glutamine derived metabolites quantified by NMR: Concentrations of  $^{13}\text{C}$ -Gln-derived-aspartate and GSH from mice treated with metformin, CB-839 or combination.
